# Supplementary material for: Modified Delphi panel consensus recommendations for management of severe aplastic anemia
Source: PubMed Central journal article supplement — Blood Adv. 2024 Apr 29;8(15):3946–60. doi: 10.1182/bloodadvances.2023011642 (PMC11331724; doi:10.1182/bloodadvances.2023011642), 2024-04-29
Supplement: BLOODA_ADV-2023-011642-mmc1.pdf [file BLOODA_ADV-2023-011642-mmc1.pdf]

## Supplementary Appendix

### All Panelists

In each cell below, the group rated the appropriateness of the treatment strategies on a 1 to 9 scale, where:

|                                                   |     |                                                                                 |     |                                                 |
|---------------------------------------------------|-----|---------------------------------------------------------------------------------|-----|-------------------------------------------------|
| 1                                                 | ← → | 5                                                                               | ← → | 9                                               |
| highly inappropriate, risks outweigh the benefits |     | not sure (e.g., due to inadequate data) or the risks and benefits seem balanced |     | highly appropriate, benefits outweigh the risks |

The following document presents the group's ratings median and range of ratings. Each cell is color coded. Cells in yellow are ones where the group disagreed (≥2 panelists gave that cell a rating of 1-3 and ≥2 panelists gave that cell a rating of 7-9); cells in blue are ones where the group agreed, with the darker blues representing higher medians, as shown in the key on the right.

| Median                                                         | (Range) |
|----------------------------------------------------------------|---------|
| Yellow: Disagreement (≥2 ratings of 1-3 and ≥2 ratings of 7-9) |         |
| Blue 1: Median ≥7-9 without disagreement                       |         |
| Blue 2: Median ≥4-<7 without disagreement                      |         |
| Blue 3: Median 1-<4 without disagreement                       |         |

### Part I. Initial management

**Table 1.** First, imagine a patient in whom you have confirmed a diagnosis of acquired SAA (i.e., you have ruled out inherited SAA) who has not received any prior treatments. Consider the appropriateness of the following therapies first-line [8]. The columns and meta rows describe different types of patients. For example, the patient in cells A1-3 is a medically fit ≤20-year-old who has a matched related donor available.

| Do your best to imagine a <u>typical patient</u> with these characteristics. For each patient, rate the appropriateness of the following therapies <u>first-line</u> on a 1 to 9 scale, where 1 is highly inappropriate and 9 is highly appropriate. |                               | Medically fit [9] in the following age groups [10] |           |               |               |               |               |
|------------------------------------------------------------------------------------------------------------------------------------------------------------------------------------------------------------------------------------------------------|-------------------------------|----------------------------------------------------|-----------|---------------|---------------|---------------|---------------|
|                                                                                                                                                                                                                                                      |                               | ≤20                                                | 21-40     | 41-60         | >60           |               |               |
|                                                                                                                                                                                                                                                      |                               | years old                                          | years old | years old     | years old     |               |               |
| In a patient whose highest quality transplant is a                                                                                                                                                                                                   | matched related [11] donor    | HSCT                                               | 1         | 9.0 ( 9 - 9 ) | 9.0 ( 7 - 9 ) | 6.0 ( 4 - 9 ) | 5.0 ( 2 - 8 ) |
|                                                                                                                                                                                                                                                      |                               | Horse ATG + CsA + eltrombopag (triple IST)         | 2         | 5.0 ( 3 - 6 ) | 6.0 ( 3 - 8 ) | 8.0 ( 7 - 9 ) | 9.0 ( 5 - 9 ) |
|                                                                                                                                                                                                                                                      |                               | Horse ATG + CsA                                    | 3         | 6.0 ( 3 - 7 ) | 4.0 ( 2 - 7 ) | 5.0 ( 2 - 8 ) | 6.0 ( 2 - 8 ) |
|                                                                                                                                                                                                                                                      | matched unrelated [12] donor  | HSCT                                               | 4         | 7.0 ( 5 - 9 ) | 7.0 ( 4 - 9 ) | 5.0 ( 2 - 8 ) | 4.0 ( 1 - 8 ) |
|                                                                                                                                                                                                                                                      |                               | Horse ATG + CsA + eltrombopag (triple IST)         | 5         | 6.0 ( 3 - 9 ) | 8.0 ( 5 - 9 ) | 9.0 ( 7 - 9 ) | 9.0 ( 5 - 9 ) |
|                                                                                                                                                                                                                                                      |                               | Horse ATG + CsA                                    | 6         | 8.0 ( 6 - 9 ) | 6.0 ( 2 - 8 ) | 6.0 ( 2 - 9 ) | 7.0 ( 2 - 9 ) |
|                                                                                                                                                                                                                                                      | haploidentical [13] donor     | HSCT                                               | 7         | 6.0 ( 4 - 9 ) | 6.0 ( 4 - 9 ) | 5.0 ( 2 - 9 ) | 4.0 ( 1 - 8 ) |
|                                                                                                                                                                                                                                                      |                               | Horse ATG + CsA + eltrombopag (triple IST)         | 8         | 8.0 ( 3 - 9 ) | 8.0 ( 5 - 9 ) | 9.0 ( 7 - 9 ) | 9.0 ( 5 - 9 ) |
|                                                                                                                                                                                                                                                      |                               | Horse ATG + CsA                                    | 9         | 8.0 ( 6 - 9 ) | 6.0 ( 2 - 9 ) | 6.0 ( 2 - 8 ) | 6.0 ( 2 - 8 ) |
|                                                                                                                                                                                                                                                      | Unknown or no donor available | Horse ATG + CsA + eltrombopag (triple IST)         | 10        | 7.0 ( 5 - 9 ) | 9.0 ( 7 - 9 ) | 9.0 ( 7 - 9 ) | 9.0 ( 8 - 9 ) |
|                                                                                                                                                                                                                                                      |                               | Horse ATG + CsA                                    | 11        | 9.0 ( 6 - 9 ) | 7.0 ( 2 - 9 ) | 7.0 ( 2 - 9 ) | 7.0 ( 2 - 8 ) |

[8] Note that we are not asking you to consider CsA with or without eltrombopag in this table because we heard it is rare to recommend in medically fit patients

[9] ECOG ≤2 (0=Fully active, no performance restrictions; 1=Strenuous physical activity restricted, fully ambulatory and able to carry out light work; 2=Capable of all self-care but unable to carry out any work activities, up and about >50% of waking hours)

[10] Age categories based on Tichelli Haematologica 2020 (<https://www.haematologica.org/article/view/9378>)

[11] Matched sibling donor (MSD), may include matched family donor (MFD), a 10/10 match

[12] Includes matched unrelated (MUD), may also include cord blood, a 10/10 match

[13] A 5/10 match

**Part II. Subsequent management**

**Table 2a.** Next, imagine a patient who received **horse ATG + CsA + eltrombopag** (triple IST) first-line and was **refractory** [14] to this treatment. Consider the appropriateness of the following therapies **second-line** [15]. The columns and meta rows describe different types of patients. For example, the patient in cells A12-18 is a medically fit  $\leq 20$ -year-old who has a matched related donor available.

| Do your best to imagine a typical patient with these characteristics. For each patient, rate the appropriateness of the following therapies <b>second-line</b> on a 1 to 9 scale, where 1 is highly inappropriate and 9 is highly appropriate. |                             |                            | Medically fit [16] in the following age groups [17] |                    |                    |                    |
|------------------------------------------------------------------------------------------------------------------------------------------------------------------------------------------------------------------------------------------------|-----------------------------|----------------------------|-----------------------------------------------------|--------------------|--------------------|--------------------|
|                                                                                                                                                                                                                                                |                             |                            | $\leq 20$<br>years old                              | 21-40<br>years old | 41-60<br>years old | $>60$<br>years old |
|                                                                                                                                                                                                                                                |                             |                            | A                                                   | B                  | C                  | D                  |
| matched related [18] donor                                                                                                                                                                                                                     | High intensity therapy [19] | HSCT <b>12</b>             | 9.0 ( 9 - 9 )                                       | 9.0 ( 8 - 9 )      | 8.0 ( 7 - 9 )      | 7.0 ( 4 - 8 )      |
|                                                                                                                                                                                                                                                |                             | with eltrombopag <b>13</b> | 4.0 ( 3 - 6 )                                       | 5.0 ( 3 - 6 )      | 6.0 ( 3 - 7 )      | 6.0 ( 3 - 7 )      |
|                                                                                                                                                                                                                                                |                             | with romiplostim <b>14</b> | 3.0 ( 2 - 6 )                                       | 4.0 ( 3 - 6 )      | 5.0 ( 3 - 8 )      | 5.0 ( 3 - 8 )      |
|                                                                                                                                                                                                                                                | Low intensity therapy [20]  | without TPO-RAs <b>15</b>  | 4.0 ( 1 - 5 )                                       | 4.0 ( 1 - 6 )      | 4.0 ( 1 - 6 )      | 4.0 ( 1 - 6 )      |
|                                                                                                                                                                                                                                                |                             | with eltrombopag <b>16</b> | 3.0 ( 1 - 4 )                                       | 3.0 ( 2 - 4 )      | 4.0 ( 2 - 7 )      | 4.0 ( 3 - 7 )      |
|                                                                                                                                                                                                                                                |                             | with romiplostim <b>17</b> | 3.0 ( 1 - 5 )                                       | 3.0 ( 2 - 5 )      | 4.0 ( 2 - 8 )      | 5.0 ( 3 - 8 )      |
| without TPO-RAs <b>18</b>                                                                                                                                                                                                                      | 2.0 ( 1 - 4 )               | 2.0 ( 1 - 4 )              | 3.0 ( 1 - 5 )                                       | 3.0 ( 2 - 8 )      |                    |                    |
| In a patient whose highest quality transplant is a matched unrelated [21] donor                                                                                                                                                                | High intensity therapy      | HSCT <b>19</b>             | 9.0 ( 8 - 9 )                                       | 9.0 ( 8 - 9 )      | 7.0 ( 7 - 9 )      | 6.0 ( 3 - 8 )      |
|                                                                                                                                                                                                                                                |                             | with eltrombopag <b>20</b> | 5.0 ( 3 - 7 )                                       | 5.0 ( 3 - 8 )      | 6.0 ( 3 - 9 )      | 6.0 ( 2 - 9 )      |
|                                                                                                                                                                                                                                                |                             | with romiplostim <b>21</b> | 4.0 ( 3 - 6 )                                       | 4.0 ( 3 - 6 )      | 4.0 ( 3 - 8 )      | 5.0 ( 3 - 8 )      |
|                                                                                                                                                                                                                                                | Low intensity therapy       | without TPO-RAs <b>22</b>  | 4.0 ( 1 - 8 )                                       | 4.0 ( 2 - 8 )      | 4.0 ( 2 - 8 )      | 4.0 ( 2 - 8 )      |
|                                                                                                                                                                                                                                                |                             | with eltrombopag <b>23</b> | 3.0 ( 1 - 4 )                                       | 3.0 ( 1 - 8 )      | 4.0 ( 1 - 8 )      | 5.0 ( 1 - 8 )      |
|                                                                                                                                                                                                                                                |                             | with romiplostim <b>24</b> | 2.0 ( 1 - 5 )                                       | 3.0 ( 2 - 7 )      | 4.0 ( 2 - 8 )      | 5.0 ( 3 - 9 )      |
| without TPO-RAs <b>25</b>                                                                                                                                                                                                                      | 2.0 ( 1 - 4 )               | 2.0 ( 1 - 4 )              | 3.0 ( 2 - 6 )                                       | 3.0 ( 2 - 8 )      |                    |                    |
| haploidentical [22] donor                                                                                                                                                                                                                      | High intensity therapy      | HSCT <b>26</b>             | 8.0 ( 7 - 9 )                                       | 8.0 ( 5 - 9 )      | 7.0 ( 6 - 9 )      | 5.0 ( 3 - 8 )      |
|                                                                                                                                                                                                                                                |                             | with eltrombopag <b>27</b> | 5.0 ( 3 - 7 )                                       | 5.0 ( 3 - 8 )      | 6.0 ( 3 - 9 )      | 7.0 ( 2 - 9 )      |
|                                                                                                                                                                                                                                                |                             | with romiplostim <b>28</b> | 5.0 ( 3 - 6 )                                       | 5.0 ( 3 - 6 )      | 5.0 ( 3 - 8 )      | 6.0 ( 3 - 8 )      |
|                                                                                                                                                                                                                                                | Low intensity therapy       | without TPO-RAs <b>29</b>  | 4.0 ( 1 - 8 )                                       | 4.0 ( 1 - 8 )      | 4.0 ( 1 - 8 )      | 4.0 ( 1 - 8 )      |
|                                                                                                                                                                                                                                                |                             | with eltrombopag <b>30</b> | 3.0 ( 1 - 5 )                                       | 4.0 ( 2 - 8 )      | 5.0 ( 2 - 8 )      | 6.0 ( 3 - 8 )      |
|                                                                                                                                                                                                                                                |                             | with romiplostim <b>31</b> | 3.0 ( 1 - 5 )                                       | 4.0 ( 2 - 7 )      | 5.0 ( 2 - 8 )      | 6.0 ( 4 - 9 )      |
| without TPO-RAs <b>32</b>                                                                                                                                                                                                                      | 2.0 ( 1 - 4 )               | 2.0 ( 1 - 4 )              | 3.0 ( 2 - 6 )                                       | 4.0 ( 2 - 8 )      |                    |                    |

[14] Lack of response with persistent severe pancytopenia at 6 months after 1 course of IST and still meets criteria for SAA (<https://pubmed.ncbi.nlm.nih.gov/22517900/>)

[15] After confirming there is no evidence of clonal evolution (e.g., MDS, AML)

[16] ECOG  $\leq 2$  (0=Fully active, no performance restrictions; 1=Strenuous physical activity restricted, fully ambulatory and able to carry out light work; 2=Capable of all self-care but unable to carry out any work activities, up and about >50% of waking hours)

[17] Age categories based on Tichelli Haematologica 2020 (<https://www.haematologica.org/article/view/9378>)

[18] Matched sibling donor (MSD), may include matched family donor (MFD), a 10/10 match

[19] Includes a combination of agents or single agent cyclophosphamide or alemtuzumab (see examples in "Definitions and acronyms" section above)

[20] Includes single agents other than cyclophosphamide, alemtuzumab, or TPO-RAs (see examples in "Definitions and acronyms" section above)

[21] Includes matched unrelated (MUD), may also include cord blood, a 10/10 match

[22] A 5/10 match

**Table 2b.** Next, imagine a patient who received horse **ATG + CsA + eltrombopag** (triple IST) first-line, **relapsed** [23], and again meets the criteria for SAA. Assume the patient initially responded to treatment, is still on full dose **CsA +/- eltrombopag** (e.g., within <12 months since initiation of therapy), and this relapse is **not** a loss of response as a result of discontinuation of eltrombopag. Consider the appropriateness of the following therapies **second-line** [24]. The columns and meta rows describe different types of patients. For example, the patient in cells A33-40 is a medically fit ≤20-year-old who has a matched related donor available.

| Do your best to imagine a typical patient with these characteristics. For each patient, rate the appropriateness of the following therapies <b>second-line</b> on a 1 to 9 scale, where 1 is highly inappropriate and 9 is highly appropriate. |                                                                                 |                                 | Medically fit [25] in the following age groups [26] |                 |                 |               |               |
|------------------------------------------------------------------------------------------------------------------------------------------------------------------------------------------------------------------------------------------------|---------------------------------------------------------------------------------|---------------------------------|-----------------------------------------------------|-----------------|-----------------|---------------|---------------|
|                                                                                                                                                                                                                                                |                                                                                 |                                 | ≤20 years old                                       | 21-40 years old | 41-60 years old | >60 years old |               |
|                                                                                                                                                                                                                                                |                                                                                 |                                 | A                                                   | B               | C               | D             |               |
| matched related [27] donor                                                                                                                                                                                                                     | HSCT                                                                            | 33                              | 9.0 ( 9 - 9 )                                       | 9.0 ( 8 - 9 )   | 8.0 ( 7 - 9 )   | 6.0 ( 5 - 8 ) |               |
|                                                                                                                                                                                                                                                | with eltrombopag                                                                | 34                              | 6.0 ( 2 - 9 )                                       | 6.0 ( 2 - 9 )   | 6.0 ( 4 - 9 )   | 7.0 ( 2 - 9 ) |               |
|                                                                                                                                                                                                                                                | High intensity therapy [28]                                                     | with romiplostim                | 35                                                  | 4.0 ( 2 - 5 )   | 4.0 ( 2 - 8 )   | 5.0 ( 2 - 9 ) | 5.0 ( 3 - 9 ) |
|                                                                                                                                                                                                                                                |                                                                                 | without TPO-RAs                 | 36                                                  | 4.0 ( 2 - 6 )   | 3.0 ( 2 - 6 )   | 3.0 ( 2 - 6 ) | 3.0 ( 1 - 6 ) |
|                                                                                                                                                                                                                                                | Low intensity therapy [29]                                                      | with eltrombopag                | 37                                                  | 2.0 ( 2 - 6 )   | 3.0 ( 2 - 6 )   | 4.0 ( 2 - 6 ) | 5.0 ( 2 - 7 ) |
|                                                                                                                                                                                                                                                |                                                                                 | with romiplostim                | 38                                                  | 2.0 ( 2 - 5 )   | 3.0 ( 2 - 8 )   | 3.0 ( 2 - 8 ) | 4.0 ( 2 - 8 ) |
|                                                                                                                                                                                                                                                |                                                                                 | without TPO-RAs                 | 39                                                  | 2.0 ( 1 - 3 )   | 3.0 ( 1 - 5 )   | 2.0 ( 2 - 6 ) | 3.0 ( 2 - 6 ) |
|                                                                                                                                                                                                                                                |                                                                                 | Eltrombopag (single agent only) | 40                                                  | 2.0 ( 1 - 3 )   | 2.0 ( 1 - 5 )   | 4.0 ( 1 - 6 ) | 5.0 ( 1 - 6 ) |
|                                                                                                                                                                                                                                                | In a patient whose highest quality transplant is a matched unrelated [30] donor | HSCT                            | 41                                                  | 9.0 ( 8 - 9 )   | 9.0 ( 7 - 9 )   | 7.0 ( 5 - 9 ) | 6.0 ( 4 - 8 ) |
|                                                                                                                                                                                                                                                |                                                                                 | with eltrombopag                | 42                                                  | 6.0 ( 2 - 9 )   | 6.0 ( 2 - 9 )   | 6.0 ( 4 - 9 ) | 6.0 ( 1 - 9 ) |
| High intensity therapy                                                                                                                                                                                                                         |                                                                                 | with romiplostim                | 43                                                  | 4.0 ( 2 - 6 )   | 5.0 ( 2 - 8 )   | 5.0 ( 3 - 9 ) | 5.0 ( 1 - 9 ) |
|                                                                                                                                                                                                                                                |                                                                                 | without TPO-RAs                 | 44                                                  | 4.0 ( 2 - 7 )   | 4.0 ( 2 - 6 )   | 3.0 ( 2 - 6 ) | 3.0 ( 1 - 6 ) |
| Low intensity therapy                                                                                                                                                                                                                          |                                                                                 | with eltrombopag                | 45                                                  | 3.0 ( 2 - 6 )   | 3.0 ( 2 - 7 )   | 4.0 ( 2 - 7 ) | 5.0 ( 2 - 7 ) |
|                                                                                                                                                                                                                                                |                                                                                 | with romiplostim                | 46                                                  | 2.0 ( 2 - 5 )   | 3.0 ( 2 - 8 )   | 4.0 ( 2 - 8 ) | 5.0 ( 2 - 8 ) |
|                                                                                                                                                                                                                                                |                                                                                 | without TPO-RAs                 | 47                                                  | 2.0 ( 1 - 3 )   | 3.0 ( 1 - 5 )   | 3.0 ( 2 - 7 ) | 3.0 ( 2 - 6 ) |
| Eltrombopag (single agent only)                                                                                                                                                                                                                | 48                                                                              | 2.0 ( 1 - 5 )                   | 2.0 ( 1 - 5 )                                       | 3.0 ( 1 - 6 )   | 5.0 ( 1 - 6 )   |               |               |
| haploidentical [31] donor                                                                                                                                                                                                                      | HSCT                                                                            | 49                              | 9.0 ( 3 - 9 )                                       | 8.0 ( 7 - 9 )   | 7.0 ( 4 - 9 )   | 5.0 ( 3 - 8 ) |               |
|                                                                                                                                                                                                                                                | with eltrombopag                                                                | 50                              | 6.0 ( 4 - 9 )                                       | 7.0 ( 2 - 9 )   | 7.0 ( 2 - 9 )   | 7.0 ( 1 - 9 ) |               |
|                                                                                                                                                                                                                                                | High intensity therapy                                                          | with romiplostim                | 51                                                  | 4.0 ( 2 - 8 )   | 5.0 ( 2 - 8 )   | 5.0 ( 2 - 9 ) | 5.0 ( 1 - 9 ) |
|                                                                                                                                                                                                                                                |                                                                                 | without TPO-RAs                 | 52                                                  | 5.0 ( 2 - 7 )   | 4.0 ( 2 - 7 )   | 3.0 ( 2 - 6 ) | 3.0 ( 1 - 6 ) |
|                                                                                                                                                                                                                                                | Low intensity therapy                                                           | with eltrombopag                | 53                                                  | 4.0 ( 2 - 6 )   | 4.0 ( 2 - 7 )   | 4.0 ( 2 - 7 ) | 4.0 ( 2 - 7 ) |
|                                                                                                                                                                                                                                                |                                                                                 | with romiplostim                | 54                                                  | 3.0 ( 2 - 5 )   | 3.0 ( 2 - 8 )   | 4.0 ( 2 - 8 ) | 4.0 ( 2 - 8 ) |
|                                                                                                                                                                                                                                                |                                                                                 | without TPO-RAs                 | 55                                                  | 2.0 ( 1 - 4 )   | 3.0 ( 1 - 5 )   | 3.0 ( 2 - 5 ) | 3.0 ( 2 - 6 ) |
| Eltrombopag (single agent only)                                                                                                                                                                                                                | 56                                                                              | 2.0 ( 1 - 6 )                   | 3.0 ( 1 - 6 )                                       | 5.0 ( 1 - 6 )   | 5.0 ( 1 - 6 )   |               |               |

[23] Initially responded to treatment but requires a reintroduction to or escalation of immunosuppression for decreasing blood counts, usually but not always accompanying a reinstatement of transfusions (<https://pubmed.ncbi.nlm.nih.gov/22517900/>)

[24] After confirming there is no evidence of clonal evolution (e.g., MDS, AML)

[25] ECOG ≤2 (0=Fully active, no performance restrictions; 1=Strenuous physical activity restricted, fully ambulatory and able to carry out light work; 2=Capable of all self-care but unable to carry out any work activities, up and about >50% of waking hours)

[26] Age categories based on Tichelli Haematologica 2020 (<https://www.haematologica.org/article/view/9378>)

[27] Matched sibling donor (MSD), may include matched family donor (MFD), a 10/10 match

[28] Includes a combination of agents or single agent cyclophosphamide or alemtuzumab (see examples in "Definitions and acronyms" section above)

[29] Includes single agents other than cyclophosphamide, alemtuzumab, or TPO-RAs (see examples in "Definitions and acronyms" section above)

[30] Includes matched unrelated (MUD), may also include cord blood, a 10/10 match

[31] A 5/10 match

**Table 2c.** Next, imagine a patient who received horse **ATG + CsA + eltrombopag** (triple IST) first-line, **relapsed** [32], and again meets the criteria for SAA. Assume the patient had a complete response, is no longer on full dose CsA or eltrombopag (e.g., after ≥12 months since initiation of therapy), and this is **not** a gradual loss of response during a taper [33]. Consider the appropriateness of the following therapies **second-line** [34]. The columns and meta rows describe different types of patients. For example, the patient in cells A57-64 is a medically fit ≤20-year-old who has a matched related donor available.

| Do your best to imagine a <u>typical patient</u> with these characteristics. For each patient, rate the appropriateness of the following therapies <u>second-line</u> on a 1 to 9 scale, where 1 is highly inappropriate and 9 is highly appropriate. |                                         |                                              | Medically fit [35] in the following age groups [36] |               |               |               |               |
|-------------------------------------------------------------------------------------------------------------------------------------------------------------------------------------------------------------------------------------------------------|-----------------------------------------|----------------------------------------------|-----------------------------------------------------|---------------|---------------|---------------|---------------|
|                                                                                                                                                                                                                                                       |                                         |                                              | ≤20                                                 | 21-40         | 41-60         | >60           |               |
|                                                                                                                                                                                                                                                       |                                         |                                              | years old                                           | years old     | years old     | years old     |               |
|                                                                                                                                                                                                                                                       |                                         |                                              | A                                                   | B             | C             | D             |               |
| In a patient whose highest quality transplant is a                                                                                                                                                                                                    | matched related [37] donor              | HSCT                                         | 57                                                  | 9.0 ( 7 - 9 ) | 9.0 ( 7 - 9 ) | 7.0 ( 4 - 9 ) | 6.0 ( 4 - 8 ) |
|                                                                                                                                                                                                                                                       |                                         | with eltrombopag                             | 58                                                  | 6.0 ( 5 - 8 ) | 6.0 ( 5 - 8 ) | 7.0 ( 5 - 9 ) | 6.0 ( 5 - 8 ) |
|                                                                                                                                                                                                                                                       |                                         | High intensity therapy [38] with romiplostim | 59                                                  | 4.0 ( 2 - 7 ) | 5.0 ( 2 - 8 ) | 5.0 ( 4 - 8 ) | 5.0 ( 3 - 8 ) |
|                                                                                                                                                                                                                                                       |                                         | without TPO-RAs                              | 60                                                  | 5.0 ( 2 - 7 ) | 5.0 ( 2 - 7 ) | 4.0 ( 3 - 8 ) | 5.0 ( 3 - 8 ) |
|                                                                                                                                                                                                                                                       |                                         | with eltrombopag                             | 61                                                  | 5.0 ( 2 - 9 ) | 5.0 ( 2 - 9 ) | 6.0 ( 2 - 9 ) | 5.0 ( 2 - 9 ) |
|                                                                                                                                                                                                                                                       |                                         | Low intensity therapy [39] with romiplostim  | 62                                                  | 3.0 ( 1 - 5 ) | 4.0 ( 1 - 8 ) | 5.0 ( 2 - 5 ) | 5.0 ( 2 - 9 ) |
|                                                                                                                                                                                                                                                       | without TPO-RAs                         | 63                                           | 3.0 ( 1 - 5 )                                       | 3.0 ( 1 - 5 ) | 4.0 ( 2 - 6 ) | 4.0 ( 2 - 8 ) |               |
|                                                                                                                                                                                                                                                       | Eltrombopag (single agent only)         | 64                                           | 2.0 ( 1 - 4 )                                       | 2.0 ( 1 - 5 ) | 4.0 ( 1 - 6 ) | 5.0 ( 1 - 7 ) |               |
|                                                                                                                                                                                                                                                       | matched unrelated [40] donor            | HSCT                                         | 65                                                  | 8.0 ( 7 - 9 ) | 8.0 ( 7 - 9 ) | 7.0 ( 4 - 9 ) | 5.0 ( 4 - 7 ) |
|                                                                                                                                                                                                                                                       |                                         | with eltrombopag                             | 66                                                  | 6.0 ( 5 - 9 ) | 6.0 ( 5 - 9 ) | 7.0 ( 5 - 9 ) | 6.0 ( 5 - 8 ) |
|                                                                                                                                                                                                                                                       |                                         | High intensity therapy with romiplostim      | 67                                                  | 4.0 ( 2 - 8 ) | 5.0 ( 2 - 8 ) | 6.0 ( 4 - 8 ) | 5.0 ( 4 - 8 ) |
|                                                                                                                                                                                                                                                       |                                         | without TPO-RAs                              | 68                                                  | 5.0 ( 2 - 7 ) | 5.0 ( 2 - 7 ) | 5.0 ( 2 - 8 ) | 5.0 ( 2 - 8 ) |
| with eltrombopag                                                                                                                                                                                                                                      |                                         | 69                                           | 5.0 ( 2 - 9 )                                       | 5.0 ( 2 - 9 ) | 6.0 ( 2 - 9 ) | 6.0 ( 3 - 9 ) |               |
| Low intensity therapy with romiplostim                                                                                                                                                                                                                |                                         | 70                                           | 3.0 ( 1 - 6 )                                       | 4.0 ( 1 - 8 ) | 5.0 ( 2 - 6 ) | 5.0 ( 2 - 8 ) |               |
| without TPO-RAs                                                                                                                                                                                                                                       | 71                                      | 3.0 ( 1 - 5 )                                | 4.0 ( 1 - 5 )                                       | 5.0 ( 2 - 6 ) | 4.0 ( 2 - 7 ) |               |               |
| Eltrombopag (single agent only)                                                                                                                                                                                                                       | 72                                      | 2.0 ( 1 - 4 )                                | 3.0 ( 1 - 6 )                                       | 4.0 ( 1 - 6 ) | 5.0 ( 1 - 6 ) |               |               |
| haploidentical [41] donor                                                                                                                                                                                                                             | HSCT                                    | 73                                           | 8.0 ( 7 - 9 )                                       | 8.0 ( 6 - 9 ) | 7.0 ( 5 - 9 ) | 5.0 ( 1 - 7 ) |               |
|                                                                                                                                                                                                                                                       | with eltrombopag                        | 74                                           | 6.0 ( 5 - 9 )                                       | 6.0 ( 5 - 9 ) | 8.0 ( 4 - 9 ) | 7.0 ( 5 - 8 ) |               |
|                                                                                                                                                                                                                                                       | High intensity therapy with romiplostim | 75                                           | 4.0 ( 2 - 8 )                                       | 6.0 ( 2 - 8 ) | 7.0 ( 4 - 8 ) | 5.0 ( 4 - 8 ) |               |
|                                                                                                                                                                                                                                                       | without TPO-RAs                         | 76                                           | 5.0 ( 2 - 7 )                                       | 5.0 ( 2 - 7 ) | 4.0 ( 3 - 8 ) | 5.0 ( 3 - 8 ) |               |
|                                                                                                                                                                                                                                                       | with eltrombopag                        | 77                                           | 5.0 ( 2 - 9 )                                       | 5.0 ( 2 - 9 ) | 6.0 ( 2 - 9 ) | 6.0 ( 2 - 9 ) |               |
|                                                                                                                                                                                                                                                       | Low intensity therapy with romiplostim  | 78                                           | 3.0 ( 1 - 6 )                                       | 4.0 ( 1 - 8 ) | 5.0 ( 2 - 7 ) | 5.0 ( 2 - 7 ) |               |
| without TPO-RAs                                                                                                                                                                                                                                       | 79                                      | 3.0 ( 1 - 6 )                                | 4.0 ( 1 - 6 )                                       | 5.0 ( 2 - 6 ) | 5.0 ( 2 - 6 ) |               |               |
| Eltrombopag (single agent only)                                                                                                                                                                                                                       | 80                                      | 2.0 ( 1 - 5 )                                | 4.0 ( 1 - 6 )                                       | 4.0 ( 1 - 6 ) | 5.0 ( 1 - 8 ) |               |               |

[32] Initially responded to treatment but requires a reintroduction to or escalation of immunosuppression for decreasing blood counts, usually but not always accompanying a reinstitution of transfusions (<https://pubmed.ncbi.nlm.nih.gov/22517900/>)

[33] If the patient experienced a gradual loss of response during a medication taper (e.g., eltrombopag, CsA), treatment would include reverting back to the prior, higher dose of medication

[34] After confirming there is no evidence of clonal evolution (e.g., MDS, AML)

[35] ECOG ≤2 (0=Fully active, no performance restrictions; 1=Strenuous physical activity restricted, fully ambulatory and able to carry out light work; 2=Capable of all self-care but unable to carry out any work activities, up and about >50% of waking hours)

[36] Age categories based on Tichelli Haematologica 2020 (<https://www.haematologica.org/article/view/9378>)

[37] Matched sibling donor (MSD), may include matched family donor (MFD), a 10/10 match

[38] Includes a combination of agents or single agent cyclophosphamide or alemtuzumab (see examples in "Definitions and acronyms" section above)

[39] Includes single agents other than cyclophosphamide, alemtuzumab, or TPO-RAs (see examples in "Definitions and acronyms" section above)

[40] Includes matched unrelated (MUD), may also include cord blood, a 10/10 match

[41] A 5/10 match

**Table 3a.** Next, imagine a patient who received **horse ATG + CsA** (without eltrombopag) first-line and was **refractory** [42] to this treatment. Consider the appropriateness of the following therapies **second-line** [43]. The columns and meta rows describe different types of patients. For example, the patient in cells A81-88 is a medically fit  $\leq 20$ -year-old who has a matched related donor available.

| Do your best to imagine a <u>typical patient</u> with these characteristics. For each patient, rate the appropriateness of the following therapies <b>second-line</b> on a 1 to 9 scale, where 1 is highly inappropriate and 9 is highly appropriate. |                                 | Medically fit [44] in the following age groups [45] |               |               |               |               |               |
|-------------------------------------------------------------------------------------------------------------------------------------------------------------------------------------------------------------------------------------------------------|---------------------------------|-----------------------------------------------------|---------------|---------------|---------------|---------------|---------------|
|                                                                                                                                                                                                                                                       |                                 | $\leq 20$                                           | 21-40         | 41-60         | $>60$         |               |               |
|                                                                                                                                                                                                                                                       |                                 | years old                                           | years old     | years old     | years old     |               |               |
| matched related [46] donor                                                                                                                                                                                                                            | HSCT                            | 81                                                  | 9.0 ( 7 - 9 ) | 9.0 ( 7 - 9 ) | 8.0 ( 4 - 9 ) | 7.0 ( 1 - 8 ) |               |
|                                                                                                                                                                                                                                                       | High intensity therapy [47]     | with eltrombopag                                    | 82            | 5.0 ( 2 - 8 ) | 5.0 ( 2 - 8 ) | 6.0 ( 2 - 8 ) | 6.0 ( 2 - 8 ) |
|                                                                                                                                                                                                                                                       |                                 | with romiplostim                                    | 83            | 4.0 ( 1 - 5 ) | 4.0 ( 1 - 5 ) | 4.0 ( 2 - 7 ) | 5.0 ( 2 - 7 ) |
|                                                                                                                                                                                                                                                       |                                 | without TPO-RAs                                     | 84            | 3.0 ( 1 - 7 ) | 3.0 ( 1 - 7 ) | 4.0 ( 1 - 8 ) | 5.0 ( 1 - 8 ) |
|                                                                                                                                                                                                                                                       | Low intensity therapy [48]      | with eltrombopag                                    | 85            | 5.0 ( 2 - 8 ) | 6.0 ( 4 - 8 ) | 6.0 ( 4 - 8 ) | 6.0 ( 4 - 8 ) |
|                                                                                                                                                                                                                                                       |                                 | with romiplostim                                    | 86            | 3.0 ( 3 - 7 ) | 4.0 ( 3 - 7 ) | 5.0 ( 3 - 8 ) | 5.0 ( 3 - 8 ) |
|                                                                                                                                                                                                                                                       |                                 | without TPO-RAs                                     | 87            | 3.0 ( 2 - 4 ) | 3.0 ( 2 - 4 ) | 3.0 ( 2 - 5 ) | 3.0 ( 2 - 5 ) |
|                                                                                                                                                                                                                                                       | Eltrombopag (single agent only) | 88                                                  | 3.0 ( 2 - 5 ) | 5.0 ( 2 - 6 ) | 6.0 ( 2 - 7 ) | 6.0 ( 3 - 7 ) |               |
| In a patient whose highest quality transplant is a matched unrelated [49] donor                                                                                                                                                                       | HSCT                            | 89                                                  | 9.0 ( 6 - 9 ) | 9.0 ( 6 - 9 ) | 7.0 ( 4 - 9 ) | 6.0 ( 1 - 8 ) |               |
|                                                                                                                                                                                                                                                       | High intensity therapy          | with eltrombopag                                    | 90            | 5.0 ( 2 - 8 ) | 5.0 ( 2 - 8 ) | 6.0 ( 4 - 9 ) | 6.0 ( 4 - 9 ) |
|                                                                                                                                                                                                                                                       |                                 | with romiplostim                                    | 91            | 4.0 ( 1 - 5 ) | 4.0 ( 1 - 5 ) | 5.0 ( 4 - 7 ) | 5.0 ( 3 - 7 ) |
|                                                                                                                                                                                                                                                       |                                 | without TPO-RAs                                     | 92            | 3.0 ( 1 - 7 ) | 3.0 ( 1 - 7 ) | 4.0 ( 1 - 8 ) | 5.0 ( 1 - 8 ) |
|                                                                                                                                                                                                                                                       | Low intensity therapy           | with eltrombopag                                    | 93            | 5.0 ( 2 - 8 ) | 6.0 ( 2 - 8 ) | 6.0 ( 2 - 8 ) | 6.0 ( 4 - 8 ) |
|                                                                                                                                                                                                                                                       |                                 | with romiplostim                                    | 94            | 3.0 ( 2 - 7 ) | 4.0 ( 2 - 7 ) | 5.0 ( 2 - 8 ) | 5.0 ( 3 - 8 ) |
|                                                                                                                                                                                                                                                       |                                 | without TPO-RAs                                     | 95            | 3.0 ( 2 - 4 ) | 3.0 ( 2 - 4 ) | 3.0 ( 2 - 5 ) | 3.0 ( 2 - 5 ) |
|                                                                                                                                                                                                                                                       | Eltrombopag (single agent only) | 96                                                  | 3.0 ( 1 - 5 ) | 5.0 ( 1 - 6 ) | 6.0 ( 2 - 8 ) | 6.0 ( 3 - 8 ) |               |
| haploidentical [50] donor                                                                                                                                                                                                                             | HSCT                            | 97                                                  | 9.0 ( 6 - 9 ) | 8.0 ( 6 - 9 ) | 7.0 ( 3 - 9 ) | 6.0 ( 1 - 8 ) |               |
|                                                                                                                                                                                                                                                       | High intensity therapy          | with eltrombopag                                    | 98            | 6.0 ( 2 - 8 ) | 6.0 ( 2 - 8 ) | 7.0 ( 4 - 8 ) | 7.0 ( 4 - 8 ) |
|                                                                                                                                                                                                                                                       |                                 | with romiplostim                                    | 99            | 5.0 ( 1 - 6 ) | 5.0 ( 1 - 6 ) | 5.0 ( 4 - 8 ) | 5.0 ( 3 - 8 ) |
|                                                                                                                                                                                                                                                       |                                 | without TPO-RAs                                     | 100           | 3.0 ( 1 - 7 ) | 3.0 ( 1 - 7 ) | 4.0 ( 1 - 8 ) | 5.0 ( 1 - 8 ) |
|                                                                                                                                                                                                                                                       | Low intensity therapy           | with eltrombopag                                    | 101           | 6.0 ( 2 - 8 ) | 6.0 ( 2 - 8 ) | 6.0 ( 2 - 8 ) | 7.0 ( 4 - 8 ) |
|                                                                                                                                                                                                                                                       |                                 | with romiplostim                                    | 102           | 3.0 ( 2 - 7 ) | 5.0 ( 2 - 7 ) | 5.0 ( 2 - 8 ) | 5.0 ( 3 - 8 ) |
|                                                                                                                                                                                                                                                       |                                 | without TPO-RAs                                     | 103           | 3.0 ( 2 - 4 ) | 3.0 ( 2 - 4 ) | 3.0 ( 2 - 5 ) | 3.0 ( 2 - 5 ) |
|                                                                                                                                                                                                                                                       | Eltrombopag (single agent only) | 104                                                 | 3.0 ( 1 - 6 ) | 5.0 ( 1 - 6 ) | 6.0 ( 2 - 8 ) | 6.0 ( 3 - 8 ) |               |

[42] Lack of response with persistent severe pancytopenia at 6 months after 1 course of IST and still meets criteria for SAA (<https://pubmed.ncbi.nlm.nih.gov/22517900/>)

[43] After confirming there is no evidence of clonal evolution (e.g., MDS, AML)

[44] ECOG  $\leq 2$  (0=Fully active, no performance restrictions; 1=Strenuous physical activity restricted, fully ambulatory and able to carry out light work; 2=Capable of all self-care but unable to carry out any work activities, up and about >50% of waking hours)

[45] Age categories based on Tichelli Haematologica 2020 (<https://www.haematologica.org/article/view/9378>)

[46] Matched sibling donor (MSD), may include matched family donor (MFD), a 10/10 match

[47] Includes a combination of agents or single agent cyclophosphamide or alemtuzumab (see examples in "Definitions and acronyms" section above)

[48] Includes single agents other than cyclophosphamide, alemtuzumab, or TPO-RAs (see examples in "Definitions and acronyms" section above)

[49] Includes matched unrelated (MUD), may also include cord blood, a 10/10 match

[50] A 5/10 match

**Table 3b.** Next, imagine a patient who received **horse ATG + CsA** (without eltrombopag) first-line, **relapsed** [51], and again meets the criteria for SAA. Assume the patient initially responded to treatment and is still on full dose **CsA** (e.g., within <12 months since initiation of therapy). Consider the appropriateness of the following therapies **second-line** [52]. The columns and meta rows describe different types of patients. For example, the patient in cells A105-112 is a medically fit ≤20-year-old who has a matched related donor available.

| Do your best to imagine a typical patient with these characteristics. For each patient, rate the appropriateness of the following therapies <b>second-line</b> on a 1 to 9 scale, where 1 is highly inappropriate and 9 is highly appropriate. |                                         |                                              | Medically fit [53] in the following age groups [54] |               |               |               |               |
|------------------------------------------------------------------------------------------------------------------------------------------------------------------------------------------------------------------------------------------------|-----------------------------------------|----------------------------------------------|-----------------------------------------------------|---------------|---------------|---------------|---------------|
|                                                                                                                                                                                                                                                |                                         |                                              | ≤20                                                 | 21-40         | 41-60         | >60           |               |
|                                                                                                                                                                                                                                                |                                         |                                              | years old                                           | years old     | years old     | years old     |               |
| In a patient whose highest quality transplant is a                                                                                                                                                                                             | matched related [55] donor              | HSCT                                         | 105                                                 | 9.0 ( 5 - 9 ) | 9.0 ( 5 - 9 ) | 7.0 ( 1 - 9 ) | 7.0 ( 1 - 8 ) |
|                                                                                                                                                                                                                                                |                                         | with eltrombopag                             | 106                                                 | 5.0 ( 4 - 8 ) | 6.0 ( 4 - 8 ) | 6.0 ( 4 - 8 ) | 6.0 ( 4 - 8 ) |
|                                                                                                                                                                                                                                                |                                         | High intensity therapy [56] with romiplostim | 107                                                 | 4.0 ( 2 - 5 ) | 4.0 ( 2 - 5 ) | 4.0 ( 2 - 7 ) | 5.0 ( 2 - 7 ) |
|                                                                                                                                                                                                                                                |                                         | without TPO-RAs                              | 108                                                 | 3.0 ( 2 - 7 ) | 3.0 ( 1 - 7 ) | 3.0 ( 1 - 5 ) | 3.0 ( 1 - 5 ) |
|                                                                                                                                                                                                                                                |                                         | with eltrombopag                             | 109                                                 | 6.0 ( 2 - 7 ) | 6.0 ( 4 - 7 ) | 7.0 ( 4 - 9 ) | 7.0 ( 4 - 9 ) |
|                                                                                                                                                                                                                                                |                                         | Low intensity therapy [57] with romiplostim  | 110                                                 | 4.0 ( 2 - 7 ) | 4.0 ( 2 - 7 ) | 5.0 ( 2 - 8 ) | 5.0 ( 2 - 8 ) |
|                                                                                                                                                                                                                                                | without TPO-RAs                         | 111                                          | 3.0 ( 1 - 4 )                                       | 3.0 ( 1 - 4 ) | 3.0 ( 1 - 7 ) | 3.0 ( 1 - 7 ) |               |
|                                                                                                                                                                                                                                                | Eltrombopag (single agent only)         | 112                                          | 3.0 ( 2 - 5 )                                       | 3.0 ( 2 - 6 ) | 5.0 ( 2 - 7 ) | 5.0 ( 2 - 7 ) |               |
|                                                                                                                                                                                                                                                | matched unrelated [58] donor            | HSCT                                         | 113                                                 | 9.0 ( 5 - 9 ) | 9.0 ( 5 - 9 ) | 7.0 ( 1 - 9 ) | 6.0 ( 1 - 8 ) |
|                                                                                                                                                                                                                                                |                                         | with eltrombopag                             | 114                                                 | 6.0 ( 4 - 9 ) | 6.0 ( 4 - 9 ) | 6.0 ( 4 - 8 ) | 7.0 ( 4 - 8 ) |
|                                                                                                                                                                                                                                                |                                         | High intensity therapy with romiplostim      | 115                                                 | 4.0 ( 2 - 8 ) | 4.0 ( 2 - 8 ) | 4.0 ( 2 - 7 ) | 5.0 ( 2 - 7 ) |
|                                                                                                                                                                                                                                                |                                         | without TPO-RAs                              | 116                                                 | 4.0 ( 1 - 7 ) | 4.0 ( 1 - 7 ) | 3.0 ( 1 - 5 ) | 4.0 ( 1 - 5 ) |
| with eltrombopag                                                                                                                                                                                                                               |                                         | 117                                          | 5.0 ( 2 - 7 )                                       | 6.0 ( 4 - 7 ) | 6.0 ( 4 - 9 ) | 6.0 ( 4 - 9 ) |               |
| Low intensity therapy with romiplostim                                                                                                                                                                                                         |                                         | 118                                          | 3.0 ( 2 - 7 )                                       | 4.0 ( 2 - 7 ) | 5.0 ( 2 - 8 ) | 5.0 ( 2 - 8 ) |               |
| without TPO-RAs                                                                                                                                                                                                                                | 119                                     | 3.0 ( 1 - 5 )                                | 3.0 ( 1 - 5 )                                       | 3.0 ( 1 - 7 ) | 3.0 ( 1 - 7 ) |               |               |
| Eltrombopag (single agent only)                                                                                                                                                                                                                | 120                                     | 3.0 ( 1 - 5 )                                | 3.0 ( 2 - 6 )                                       | 5.0 ( 2 - 7 ) | 5.0 ( 2 - 7 ) |               |               |
| haploidentical [59] donor                                                                                                                                                                                                                      | HSCT                                    | 121                                          | 8.0 ( 7 - 9 )                                       | 8.0 ( 7 - 9 ) | 6.0 ( 6 - 9 ) | 5.0 ( 2 - 8 ) |               |
|                                                                                                                                                                                                                                                | with eltrombopag                        | 122                                          | 6.0 ( 4 - 8 )                                       | 6.0 ( 4 - 7 ) | 7.0 ( 4 - 8 ) | 7.0 ( 4 - 8 ) |               |
|                                                                                                                                                                                                                                                | High intensity therapy with romiplostim | 123                                          | 4.0 ( 2 - 5 )                                       | 4.0 ( 2 - 5 ) | 5.0 ( 2 - 7 ) | 5.0 ( 2 - 7 ) |               |
|                                                                                                                                                                                                                                                | without TPO-RAs                         | 124                                          | 3.0 ( 1 - 7 )                                       | 3.0 ( 1 - 7 ) | 4.0 ( 1 - 5 ) | 4.0 ( 1 - 5 ) |               |
|                                                                                                                                                                                                                                                | with eltrombopag                        | 125                                          | 5.0 ( 2 - 7 )                                       | 5.0 ( 4 - 7 ) | 6.0 ( 4 - 9 ) | 7.0 ( 4 - 9 ) |               |
|                                                                                                                                                                                                                                                | Low intensity therapy with romiplostim  | 126                                          | 4.0 ( 2 - 7 )                                       | 4.0 ( 2 - 7 ) | 5.0 ( 2 - 8 ) | 5.0 ( 2 - 8 ) |               |
| without TPO-RAs                                                                                                                                                                                                                                | 127                                     | 3.0 ( 1 - 4 )                                | 3.0 ( 1 - 5 )                                       | 3.0 ( 1 - 7 ) | 3.0 ( 1 - 7 ) |               |               |
| Eltrombopag (single agent only)                                                                                                                                                                                                                | 128                                     | 4.0 ( 1 - 5 )                                | 4.0 ( 2 - 6 )                                       | 5.0 ( 2 - 7 ) | 5.0 ( 2 - 7 ) |               |               |

[51] Initially responded to treatment but requires a reintroduction to or escalation of immunosuppression for decreasing blood counts, usually but not always accompanying a reinstatement of transfusions (<https://pubmed.ncbi.nlm.nih.gov/22517900/>)

[52] After confirming there is no evidence of clonal evolution (e.g., MDS, AML)

[53] ECOG ≤2 (0=Fully active, no performance restrictions; 1=Strenuous physical activity restricted, fully ambulatory and able to carry out light work; 2=Capable of all self-care but unable to carry out any work activities, up and about >50% of waking hours)

[54] Age categories based on Tichelli Haematologica 2020 (<https://www.haematologica.org/article/view/9378>)

[55] Matched sibling donor (MSD), may include matched family donor (MFD), a 10/10 match

[56] Includes a combination of agents or single agent cyclophosphamide or alemtuzumab (see examples in "Definitions and acronyms" section above)

[57] Includes single agents other than cyclophosphamide, alemtuzumab, or TPO-RAs (see examples in "Definitions and acronyms" section above)

[58] Includes matched unrelated (MUD), may also include cord blood, a 10/10 match

[59] A 5/10 match

**Table 3c.** Next, imagine a patient who received **horse ATG + CsA** (without eltrombopag) first-line, **relapsed** [60], and again meets the criteria for SAA. Assume the patient had a complete response, is no longer on full dose CsA (e.g., after ≥12 months since initiation of therapy), and this is **not** a gradual loss of response during a taper [61]. Consider the appropriateness of the following therapies **second-line** [62]. The columns and meta rows describe different types of patients. For example, the patient in cells A129-136 is a medically fit ≤20-year-old who has a matched related donor available.

| Do your best to imagine a typical patient with these characteristics. For each patient, rate the appropriateness of the following therapies <b>second-line</b> on a 1 to 9 scale, where 1 is highly inappropriate and 9 is highly appropriate. |                                              | Medically fit [63] in the following age groups [64] |               |               |               |               |
|------------------------------------------------------------------------------------------------------------------------------------------------------------------------------------------------------------------------------------------------|----------------------------------------------|-----------------------------------------------------|---------------|---------------|---------------|---------------|
|                                                                                                                                                                                                                                                |                                              | ≤20                                                 | 21-40         | 41-60         | >60           |               |
|                                                                                                                                                                                                                                                |                                              | years old                                           | years old     | years old     | years old     |               |
|                                                                                                                                                                                                                                                |                                              | <b>A</b>                                            | <b>B</b>      | <b>C</b>      | <b>D</b>      |               |
| matched related [65] donor                                                                                                                                                                                                                     | HSCT                                         | 129                                                 | 9.0 ( 7 - 9 ) | 9.0 ( 6 - 9 ) | 7.0 ( 2 - 9 ) | 6.0 ( 2 - 8 ) |
|                                                                                                                                                                                                                                                | with eltrombopag                             | 130                                                 | 6.0 ( 4 - 8 ) | 6.0 ( 4 - 8 ) | 7.0 ( 4 - 8 ) | 8.0 ( 5 - 8 ) |
|                                                                                                                                                                                                                                                | High intensity therapy [66] with romiplostim | 131                                                 | 5.0 ( 2 - 6 ) | 5.0 ( 3 - 6 ) | 5.0 ( 4 - 7 ) | 5.0 ( 4 - 7 ) |
|                                                                                                                                                                                                                                                | without TPO-RAs                              | 132                                                 | 4.0 ( 2 - 7 ) | 4.0 ( 1 - 7 ) | 3.0 ( 1 - 5 ) | 4.0 ( 1 - 5 ) |
|                                                                                                                                                                                                                                                | Low intensity therapy [67] with eltrombopag  | 133                                                 | 5.0 ( 2 - 7 ) | 6.0 ( 4 - 7 ) | 6.0 ( 4 - 7 ) | 7.0 ( 4 - 8 ) |
|                                                                                                                                                                                                                                                | with romiplostim                             | 134                                                 | 4.0 ( 3 - 9 ) | 5.0 ( 3 - 9 ) | 5.0 ( 3 - 9 ) | 6.0 ( 3 - 8 ) |
|                                                                                                                                                                                                                                                | without TPO-RAs                              | 135                                                 | 3.0 ( 2 - 8 ) | 3.0 ( 2 - 8 ) | 4.0 ( 2 - 8 ) | 4.0 ( 2 - 8 ) |
|                                                                                                                                                                                                                                                | Eltrombopag (single agent only)              | 136                                                 | 3.0 ( 2 - 5 ) | 4.0 ( 2 - 6 ) | 5.0 ( 2 - 6 ) | 5.0 ( 2 - 7 ) |
|                                                                                                                                                                                                                                                | HSCT                                         | 137                                                 | 9.0 ( 7 - 9 ) | 9.0 ( 6 - 9 ) | 7.0 ( 2 - 8 ) | 6.0 ( 2 - 8 ) |
|                                                                                                                                                                                                                                                | with eltrombopag                             | 138                                                 | 6.0 ( 4 - 8 ) | 6.0 ( 4 - 8 ) | 7.0 ( 4 - 8 ) | 7.0 ( 5 - 8 ) |
|                                                                                                                                                                                                                                                | High intensity therapy with romiplostim      | 139                                                 | 5.0 ( 2 - 6 ) | 5.0 ( 3 - 6 ) | 5.0 ( 4 - 7 ) | 5.0 ( 4 - 7 ) |
|                                                                                                                                                                                                                                                | without TPO-RAs                              | 140                                                 | 3.0 ( 1 - 7 ) | 3.0 ( 1 - 7 ) | 3.0 ( 1 - 5 ) | 4.0 ( 1 - 5 ) |
| Low intensity therapy with eltrombopag                                                                                                                                                                                                         | 141                                          | 5.0 ( 2 - 7 )                                       | 6.0 ( 4 - 7 ) | 7.0 ( 4 - 7 ) | 7.0 ( 4 - 8 ) |               |
| with romiplostim                                                                                                                                                                                                                               | 142                                          | 4.0 ( 2 - 7 )                                       | 5.0 ( 3 - 7 ) | 5.0 ( 3 - 8 ) | 5.0 ( 3 - 8 ) |               |
| without TPO-RAs                                                                                                                                                                                                                                | 143                                          | 3.0 ( 2 - 8 )                                       | 4.0 ( 2 - 8 ) | 4.0 ( 2 - 8 ) | 4.0 ( 2 - 8 ) |               |
| Eltrombopag (single agent only)                                                                                                                                                                                                                | 144                                          | 3.0 ( 2 - 5 )                                       | 4.0 ( 2 - 6 ) | 5.0 ( 2 - 6 ) | 5.0 ( 2 - 7 ) |               |
| In a patient whose highest quality transplant is a matched unrelated [68] donor                                                                                                                                                                | HSCT                                         | 145                                                 | 8.0 ( 6 - 9 ) | 8.0 ( 6 - 9 ) | 6.0 ( 2 - 8 ) | 5.0 ( 2 - 8 ) |
|                                                                                                                                                                                                                                                | with eltrombopag                             | 146                                                 | 6.0 ( 4 - 8 ) | 6.0 ( 4 - 8 ) | 7.0 ( 4 - 8 ) | 7.0 ( 5 - 8 ) |
|                                                                                                                                                                                                                                                | High intensity therapy with romiplostim      | 147                                                 | 5.0 ( 2 - 5 ) | 5.0 ( 3 - 5 ) | 5.0 ( 4 - 7 ) | 5.0 ( 4 - 7 ) |
|                                                                                                                                                                                                                                                | without TPO-RAs                              | 148                                                 | 3.0 ( 1 - 7 ) | 3.0 ( 1 - 7 ) | 3.0 ( 1 - 5 ) | 4.0 ( 1 - 5 ) |
|                                                                                                                                                                                                                                                | Low intensity therapy with eltrombopag       | 149                                                 | 5.0 ( 2 - 7 ) | 6.0 ( 4 - 7 ) | 6.0 ( 4 - 7 ) | 7.0 ( 4 - 8 ) |
|                                                                                                                                                                                                                                                | with romiplostim                             | 150                                                 | 4.0 ( 2 - 7 ) | 5.0 ( 3 - 7 ) | 5.0 ( 3 - 8 ) | 5.0 ( 3 - 8 ) |
|                                                                                                                                                                                                                                                | without TPO-RAs                              | 151                                                 | 3.0 ( 2 - 8 ) | 4.0 ( 2 - 8 ) | 4.0 ( 2 - 8 ) | 4.0 ( 2 - 8 ) |
|                                                                                                                                                                                                                                                | Eltrombopag (single agent only)              | 152                                                 | 4.0 ( 2 - 5 ) | 4.0 ( 2 - 6 ) | 4.0 ( 2 - 7 ) | 5.0 ( 2 - 7 ) |
|                                                                                                                                                                                                                                                | HSCT                                         | 145                                                 | 8.0 ( 6 - 9 ) | 8.0 ( 6 - 9 ) | 6.0 ( 2 - 8 ) | 5.0 ( 2 - 8 ) |
|                                                                                                                                                                                                                                                | with eltrombopag                             | 146                                                 | 6.0 ( 4 - 8 ) | 6.0 ( 4 - 8 ) | 7.0 ( 4 - 8 ) | 7.0 ( 5 - 8 ) |
|                                                                                                                                                                                                                                                | High intensity therapy with romiplostim      | 147                                                 | 5.0 ( 2 - 5 ) | 5.0 ( 3 - 5 ) | 5.0 ( 4 - 7 ) | 5.0 ( 4 - 7 ) |
|                                                                                                                                                                                                                                                | without TPO-RAs                              | 148                                                 | 3.0 ( 1 - 7 ) | 3.0 ( 1 - 7 ) | 3.0 ( 1 - 5 ) | 4.0 ( 1 - 5 ) |
| Low intensity therapy with eltrombopag                                                                                                                                                                                                         | 149                                          | 5.0 ( 2 - 7 )                                       | 6.0 ( 4 - 7 ) | 6.0 ( 4 - 7 ) | 7.0 ( 4 - 8 ) |               |
| with romiplostim                                                                                                                                                                                                                               | 150                                          | 4.0 ( 2 - 7 )                                       | 5.0 ( 3 - 7 ) | 5.0 ( 3 - 8 ) | 5.0 ( 3 - 8 ) |               |
| without TPO-RAs                                                                                                                                                                                                                                | 151                                          | 3.0 ( 2 - 8 )                                       | 4.0 ( 2 - 8 ) | 4.0 ( 2 - 8 ) | 4.0 ( 2 - 8 ) |               |
| Eltrombopag (single agent only)                                                                                                                                                                                                                | 152                                          | 4.0 ( 2 - 5 )                                       | 4.0 ( 2 - 6 ) | 4.0 ( 2 - 7 ) | 5.0 ( 2 - 7 ) |               |
| haploidentical [69] donor                                                                                                                                                                                                                      | HSCT                                         | 145                                                 | 8.0 ( 6 - 9 ) | 8.0 ( 6 - 9 ) | 6.0 ( 2 - 8 ) | 5.0 ( 2 - 8 ) |
|                                                                                                                                                                                                                                                | with eltrombopag                             | 146                                                 | 6.0 ( 4 - 8 ) | 6.0 ( 4 - 8 ) | 7.0 ( 4 - 8 ) | 7.0 ( 5 - 8 ) |
|                                                                                                                                                                                                                                                | High intensity therapy with romiplostim      | 147                                                 | 5.0 ( 2 - 5 ) | 5.0 ( 3 - 5 ) | 5.0 ( 4 - 7 ) | 5.0 ( 4 - 7 ) |
|                                                                                                                                                                                                                                                | without TPO-RAs                              | 148                                                 | 3.0 ( 1 - 7 ) | 3.0 ( 1 - 7 ) | 3.0 ( 1 - 5 ) | 4.0 ( 1 - 5 ) |
|                                                                                                                                                                                                                                                | Low intensity therapy with eltrombopag       | 149                                                 | 5.0 ( 2 - 7 ) | 6.0 ( 4 - 7 ) | 6.0 ( 4 - 7 ) | 7.0 ( 4 - 8 ) |
|                                                                                                                                                                                                                                                | with romiplostim                             | 150                                                 | 4.0 ( 2 - 7 ) | 5.0 ( 3 - 7 ) | 5.0 ( 3 - 8 ) | 5.0 ( 3 - 8 ) |
|                                                                                                                                                                                                                                                | without TPO-RAs                              | 151                                                 | 3.0 ( 2 - 8 ) | 4.0 ( 2 - 8 ) | 4.0 ( 2 - 8 ) | 4.0 ( 2 - 8 ) |
|                                                                                                                                                                                                                                                | Eltrombopag (single agent only)              | 152                                                 | 4.0 ( 2 - 5 ) | 4.0 ( 2 - 6 ) | 4.0 ( 2 - 7 ) | 5.0 ( 2 - 7 ) |

[60] Initially responded to treatment but requires a reintroduction to or escalation of immunosuppression for decreasing blood counts, usually but not always accompanying a reinstatement of transfusions (<https://pubmed.ncbi.nlm.nih.gov/22517900/>)

[61] If the patient experienced a gradual loss of response during a medication taper (e.g., eltrombopag, CsA), treatment would include reverting back to the prior, higher dose of medication

[62] After confirming there is no evidence of clonal evolution (e.g., MDS, AML)

[63] ECOG ≤2 (0=Fully active, no performance restrictions; 1=Strenuous physical activity restricted, fully ambulatory and able to carry out light work; 2=Capable of all self-care but unable to carry out any work activities, up and about >50% of waking hours)

[64] Age categories based on Tichelli Haematologica 2020 (<https://www.haematologica.org/article/view/9378>)

[65] Matched sibling donor (MSD), may include matched family donor (MFD), a 10/10 match

[66] Includes a combination of agents or single agent cyclophosphamide or alemtuzumab (see examples in "Definitions and acronyms" section above)

[67] Includes single agents other than cyclophosphamide, alemtuzumab, or TPO-RAs (see examples in "Definitions and acronyms" section above)

[68] Includes matched unrelated (MUD), may also include cord blood, a 10/10 match

[69] A 5/10 match

**Part III. Medically unfit patients**

**Table 4.** Now think about patients who are medically unfit, regardless of age. Rate the appropriateness of the following first- and second-line therapies in these patients. We have not asked you to consider transplant or donor availability in these patients since they would not be eligible for transplant.

| Do your best to imagine a <u>typical patient</u> with these characteristics. Rate the appropriateness of the following therapies on a 1 to 9 scale, where 1 is highly inappropriate and 9 is highly appropriate. |                                                 |                                             | Medically unfit [70]<br>regardless of age |               |
|------------------------------------------------------------------------------------------------------------------------------------------------------------------------------------------------------------------|-------------------------------------------------|---------------------------------------------|-------------------------------------------|---------------|
|                                                                                                                                                                                                                  |                                                 |                                             | A                                         |               |
| <b>First-line therapy</b>                                                                                                                                                                                        |                                                 |                                             |                                           |               |
| No prior therapies (i.e., rate first-line therapy)                                                                                                                                                               | High intensity [71] therapy with eltrombopag    | 153                                         | 7.0 ( 2 - 9 )                             |               |
|                                                                                                                                                                                                                  | High intensity therapy without eltrombopag      | 154                                         | 5.0 ( 1 - 8 )                             |               |
|                                                                                                                                                                                                                  | Low intensity [72] therapy with eltrombopag     | 155                                         | 7.0 ( 6 - 9 )                             |               |
|                                                                                                                                                                                                                  | Low intensity therapy without eltrombopag       | 156                                         | 6.0 ( 2 - 8 )                             |               |
| <b>Second-line therapy</b>                                                                                                                                                                                       |                                                 |                                             |                                           |               |
| Received any IST [73] with eltrombopag first-line                                                                                                                                                                | and was refractory [74] to this therapy         | Low intensity therapy [72] with eltrombopag | 157                                       | 5.0 ( 3 - 8 ) |
|                                                                                                                                                                                                                  |                                                 | with romiplostim                            | 158                                       | 6.0 ( 3 - 9 ) |
|                                                                                                                                                                                                                  |                                                 | without TPO-RAs                             | 159                                       | 4.0 ( 2 - 9 ) |
|                                                                                                                                                                                                                  | and relapsed [75] without complete response     | Low intensity therapy with eltrombopag      | 160                                       | 7.0 ( 5 - 8 ) |
|                                                                                                                                                                                                                  |                                                 | with romiplostim                            | 161                                       | 6.0 ( 5 - 9 ) |
|                                                                                                                                                                                                                  |                                                 | without TPO-RAs                             | 162                                       | 4.0 ( 2 - 9 ) |
|                                                                                                                                                                                                                  |                                                 | Eltrombopag (single agent only)             | 163                                       | 6.0 ( 3 - 8 ) |
|                                                                                                                                                                                                                  | and relapsed after complete response [76]       | Low intensity therapy with eltrombopag      | 164                                       | 8.0 ( 6 - 9 ) |
|                                                                                                                                                                                                                  |                                                 | with romiplostim                            | 165                                       | 6.0 ( 5 - 9 ) |
|                                                                                                                                                                                                                  |                                                 | without TPO-RAs                             | 166                                       | 4.0 ( 2 - 7 ) |
|                                                                                                                                                                                                                  | Eltrombopag (single agent only)                 | 167                                         | 6.0 ( 3 - 8 )                             |               |
|                                                                                                                                                                                                                  | Received any IST without eltrombopag first-line | and was refractory to this therapy          | Low intensity therapy with eltrombopag    | 168           |
| with romiplostim                                                                                                                                                                                                 |                                                 |                                             | 169                                       | 6.0 ( 4 - 8 ) |
| without TPO-RAs                                                                                                                                                                                                  |                                                 |                                             | 170                                       | 4.0 ( 2 - 5 ) |
| Eltrombopag (single agent only)                                                                                                                                                                                  |                                                 | 171                                         | 7.0 ( 3 - 9 )                             |               |
| and relapsed without complete response                                                                                                                                                                           |                                                 | Low intensity therapy with eltrombopag      | 172                                       | 8.0 ( 6 - 9 ) |
|                                                                                                                                                                                                                  |                                                 | with romiplostim                            | 173                                       | 6.0 ( 5 - 8 ) |
|                                                                                                                                                                                                                  |                                                 | without TPO-RAs                             | 174                                       | 4.0 ( 2 - 5 ) |
|                                                                                                                                                                                                                  |                                                 | Eltrombopag (single agent only)             | 175                                       | 7.0 ( 3 - 9 ) |
| and relapsed after complete response                                                                                                                                                                             |                                                 | Low intensity therapy with eltrombopag      | 176                                       | 8.0 ( 7 - 9 ) |
|                                                                                                                                                                                                                  |                                                 | with romiplostim                            | 177                                       | 6.0 ( 5 - 8 ) |
|                                                                                                                                                                                                                  |                                                 | without TPO-RAs                             | 178                                       | 4.0 ( 2 - 8 ) |
| Eltrombopag (single agent only)                                                                                                                                                                                  |                                                 | 179                                         | 7.0 ( 3 - 8 )                             |               |

[70] ECOG >2 (3=Capable of only limited self-care, confined to bed or chair >50% of waking hours; 4=Completely disabled, cannot carry out any self-care, totally confined to bed or chair)

[71] Includes a combination of agents or single agent cyclophosphamide or alemtuzumab (see examples in "Definitions and acronyms" section above)

[72] Includes single agents other than cyclophosphamide, alemtuzumab, or TPO-RAs (see examples in "Definitions and acronyms" section above)

[73] Includes horse or rabbit ATG, CsA, or other non-CsA immunosuppressants (e.g., mycophenolate mofetil, sirolimus, tacrolimus, alemtuzumab) (see "Definitions and acronyms" section above)

[74] Lack of response with persistent severe pancytopenia at 6 months after 1 course of IST and still meets criteria for SAA (<https://pubmed.ncbi.nlm.nih.gov/22517900/>)

[75] Initially responded to treatment but requires a reintroduction to or escalation of immunosuppression for decreasing blood counts, usually but not always accompanying a reinstatement of transfusions (<https://pubmed.ncbi.nlm.nih.gov/22517900/>); meets criteria for SAA

[76] Assume the patient meets criteria for SAA



**Part IV. Supportive care**

**Table 5.** Now, we would like you to think about supportive care prior to and during first-line therapy, regardless of whether the patient received medical therapy or was transplanted. Rate the appropriateness of recommending the following supportive care.

| Do your best to imagine a typical patient. Rate appropriateness on a 1 to 9 scale, where 1 is highly inappropriate and 9 is highly appropriate. |                                                                    | A                 |
|-------------------------------------------------------------------------------------------------------------------------------------------------|--------------------------------------------------------------------|-------------------|
| Leukoreduced, irradiated red blood cell and platelet transfusion                                                                                | In patients with hemoglobin <7, platelets <10,000, or symptomatic  | 180 9.0 ( 9 - 9 ) |
|                                                                                                                                                 | In asymptomatic patients with higher counts than listed in row 180 | 181 4.0 ( 1 - 9 ) |
| Antibiotic prophylaxis for pneumocystis pneumonia [77] (e.g., Bactrim, pentamidine)                                                             |                                                                    | 182 9.0 ( 5 - 9 ) |
| Antibiotic prophylaxis for gram negative coverage [77] (e.g., levofloxacin)                                                                     |                                                                    | 183 7.0 ( 3 - 9 ) |
| Antifungal prophylaxis [77] (e.g., voriconazole, fluconazole)                                                                                   |                                                                    | 184 9.0 ( 4 - 9 ) |
| Antiviral prophylaxis [77] (e.g., acyclovir)                                                                                                    |                                                                    | 185 9.0 ( 3 - 9 ) |

[77] In patients without an active infection

**Part V. Ruling out inherited SAA**

**Table 6.** Lastly, consider tests to rule out inherited SAA or rule in acquired SAA [78]. Many of these tests are available in NGS panels. Depending on the specific NGS panel, some may have to be ordered individually if not available.

| Do your best to imagine a typical patient. Rate the appropriateness on a 1 to 9 scale, where 1 is highly inappropriate and 9 is highly appropriate. | Patient age       |                 |                 |               |
|-----------------------------------------------------------------------------------------------------------------------------------------------------|-------------------|-----------------|-----------------|---------------|
|                                                                                                                                                     | ≤20 years old     | 21-40 years old | 41-60 years old | >60 years old |
|                                                                                                                                                     | A                 | B               | C               | D             |
| <b>Tests to rule out inherited SAA</b>                                                                                                              |                   |                 |                 |               |
| Chromosome breakage analysis for Fanconi anemia                                                                                                     | 186 9.0 ( 9 - 9 ) | 9.0 ( 8 - 9 )   | 7.0 ( 3 - 9 )   | 3.0 ( 2 - 7 ) |
| Telomere length analysis for Dyskeratosis congenita                                                                                                 | 187 9.0 ( 5 - 9 ) | 9.0 ( 5 - 9 )   | 7.0 ( 5 - 9 )   | 5.0 ( 3 - 7 ) |
| Genetic testing for Dyskeratosis congenita                                                                                                          | 188 7.0 ( 5 - 9 ) | 7.0 ( 4 - 9 )   | 5.0 ( 1 - 7 )   | 4.0 ( 1 - 5 ) |
| Genetic testing for germline RUNX1 mutation                                                                                                         | 189 6.0 ( 4 - 9 ) | 6.0 ( 2 - 9 )   | 5.0 ( 2 - 7 )   | 4.0 ( 1 - 5 ) |
| Genetic testing for Shwachman-Bodian-Diamond syndrome                                                                                               | 190 9.0 ( 2 - 9 ) | 8.0 ( 1 - 9 )   | 3.0 ( 1 - 6 )   | 3.0 ( 1 - 5 ) |
| Genetic testing for Diamond-Blackfan anemia                                                                                                         | 191 9.0 ( 1 - 9 ) | 7.0 ( 1 - 9 )   | 4.0 ( 1 - 6 )   | 3.0 ( 1 - 6 ) |
| Genetic testing for GATA2 deficiency                                                                                                                | 192 5.0 ( 1 - 9 ) | 5.0 ( 1 - 9 )   | 4.0 ( 1 - 6 )   | 3.0 ( 1 - 5 ) |
| Genetic testing for germline c-MPL mutation                                                                                                         | 193 5.0 ( 2 - 9 ) | 5.0 ( 1 - 7 )   | 3.0 ( 1 - 6 )   | 3.0 ( 1 - 5 ) |
| Genetic testing for germline MECOM mutation                                                                                                         | 194 5.0 ( 2 - 8 ) | 5.0 ( 1 - 7 )   | 3.0 ( 1 - 6 )   | 3.0 ( 1 - 5 ) |
| Genetic testing for SAMD9/SAMD9L syndromes                                                                                                          | 195 6.0 ( 5 - 9 ) | 5.0 ( 1 - 9 )   | 5.0 ( 1 - 6 )   | 3.0 ( 1 - 5 ) |
| Genetic testing for CTLA4 deficiency                                                                                                                | 196 5.0 ( 3 - 9 ) | 4.0 ( 1 - 9 )   | 4.0 ( 1 - 6 )   | 3.0 ( 1 - 5 ) |
| Genetic testing for congenital neutropenia                                                                                                          | 197 4.0 ( 1 - 7 ) | 4.0 ( 1 - 7 )   | 3.0 ( 1 - 6 )   | 2.0 ( 1 - 5 ) |
| <b>Tests to rule in acquired SAA</b>                                                                                                                |                   |                 |                 |               |
| PNH flow cytometry [79]                                                                                                                             | 198 9.0 ( 9 - 9 ) | 9.0 ( 9 - 9 )   | 9.0 ( 8 - 9 )   | 9.0 ( 8 - 9 ) |
| Genetic testing for 6p CN-LOH clone [79]                                                                                                            | 199 9.0 ( 5 - 9 ) | 9.0 ( 5 - 9 )   | 7.0 ( 5 - 9 )   | 7.0 ( 6 - 9 ) |

[78] DeZern AE, Churpek JE. Approach to the diagnosis of aplastic anemia. Blood Adv. 2021 Jun 22;5(12):2660-71. <https://doi.org/10.1182/bloodadvances.2021004345>
